# Supplementary material for: IL-29 enhances Toll-like receptor-mediated IL-6 and IL-8 production by the synovial fibroblasts from rheumatoid arthritis patients
Source: PubMed Central journal article supplement (PMC3978693; doi:10.1186/ar4357), 2013-10-29

Figure S5

A

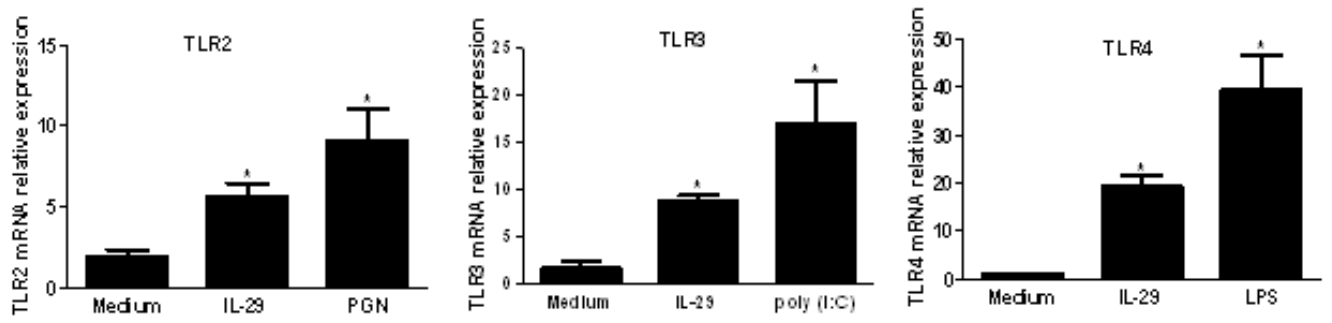

B

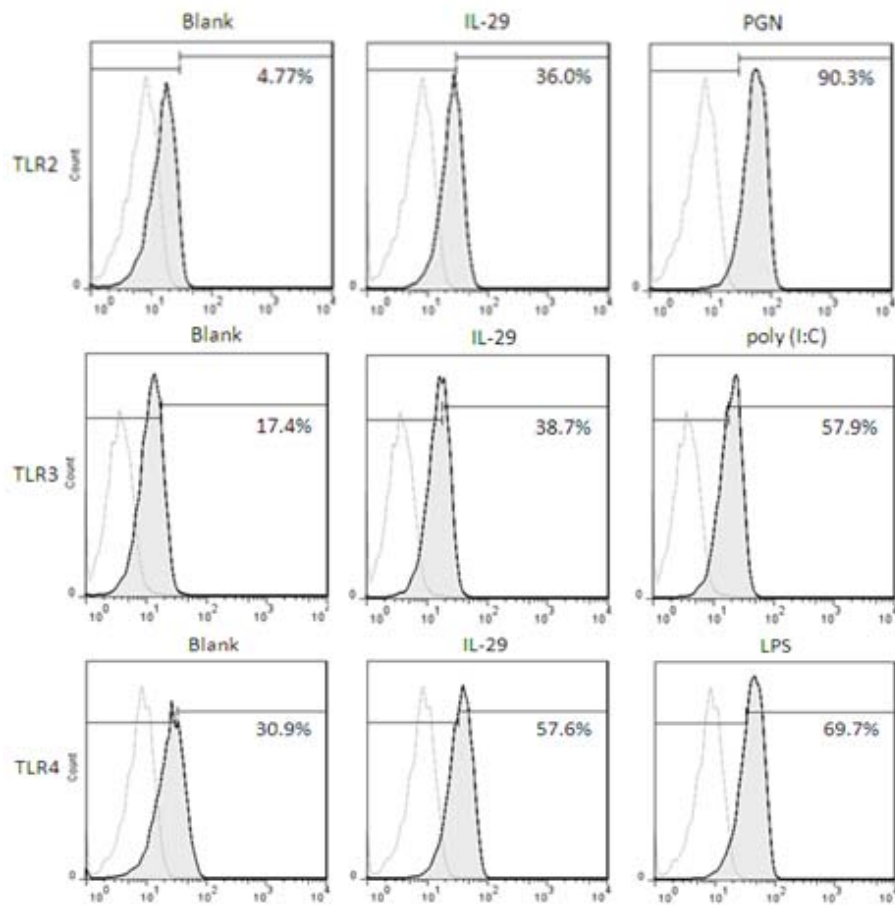

C

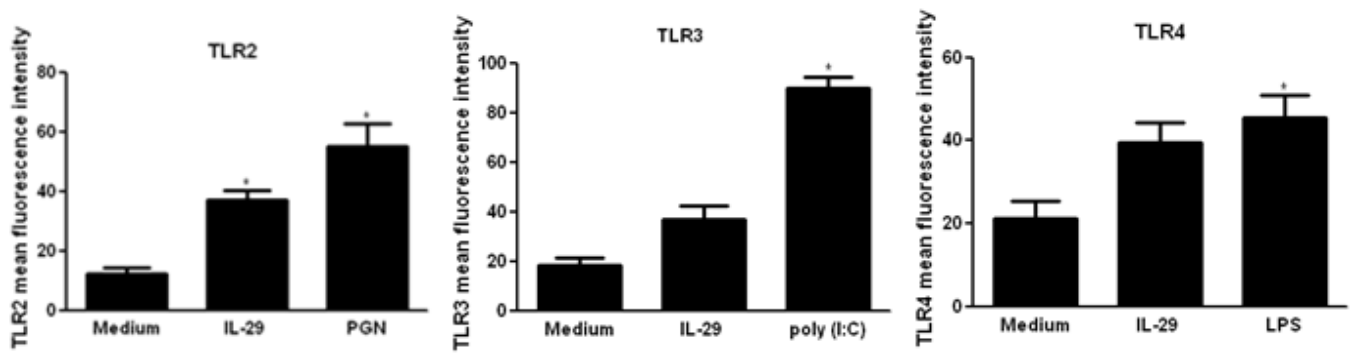

Supplement: ar4357-S6.pdf [file ar4357-S6.pdf]
